# Supplementary material for: Robust cobalt perforated with multi-walled carbon nanotubes as an effective sensing material for acetone detection
Source: Royal Society of Chemistry journal article supplement (doi:10.1039/c8qi00706c), 2018-01-01
Supplement: c8qi00706c1.pdf [file c8qi00706c1.pdf]

***Electronic Supplementary Information (ESI)***

***For***

**Robust cobalt-perforated with multi-walled carbon nanotubes as effective  
sensing materials for acetone detection**

Rui Zhang, Ming Zhang, Tingting Zhou, Tong Zhang\*

State Key Laboratory on Integrated Optoelectronics, College of Electronic Science and Engineering, Jilin University,  
Changchun 130012, PR China

Email: zhangtong@jlu.edu.cn

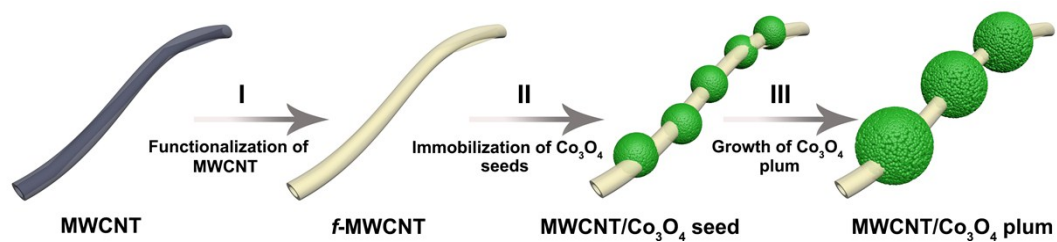

**Figure S1.** Schematic diagram of the process to fabricate MWCNTs/Co<sub>3</sub>O<sub>4</sub> plum composites: (I) functionalization of the MWCNTs by addition of surfactant and ultrasonication; (II) immobilization of Co<sub>3</sub>O<sub>4</sub> particles on MWCNT by assembly of the cobalt precursor; (III) growth of the Co<sub>3</sub>O<sub>4</sub> octahedron on MWCNT by hydrothermal process.

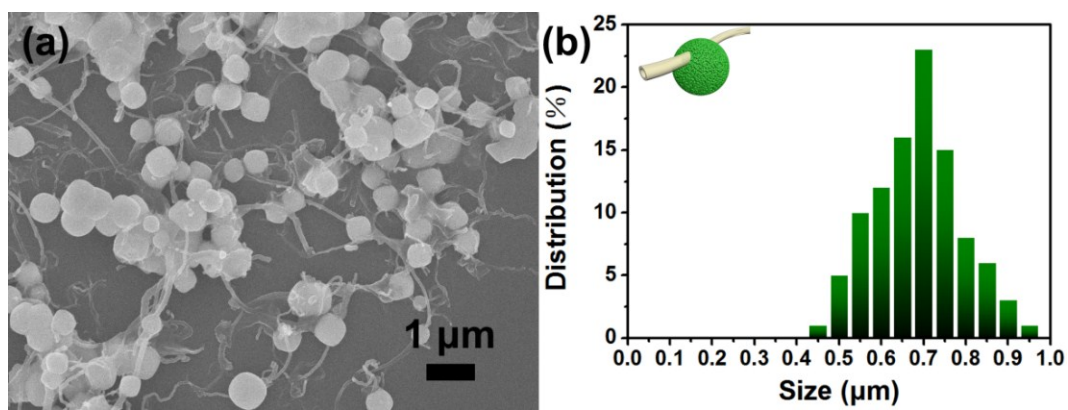

**Figure S2.** (a) SEM and (b) size distribution of  $\text{Co}_3\text{O}_4$  plum.

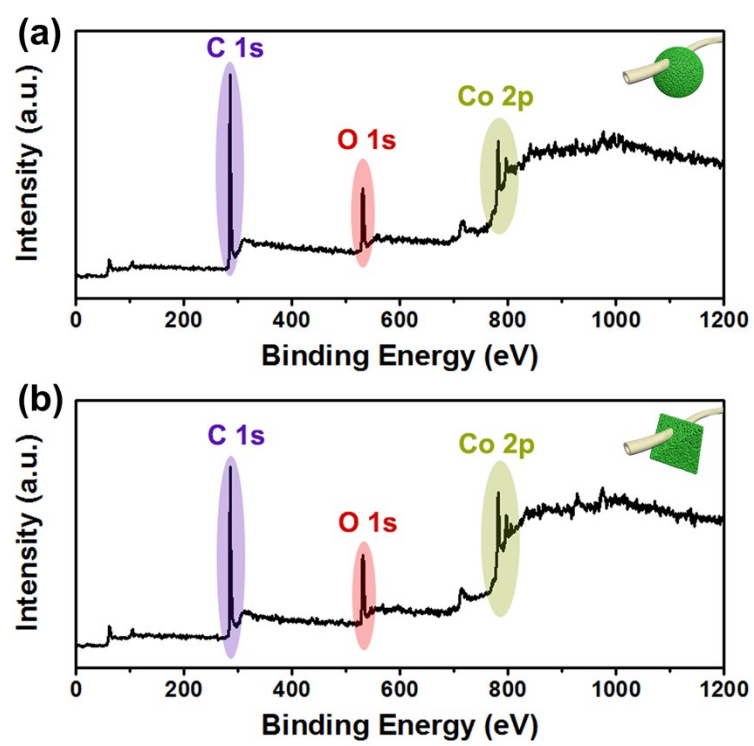

**Figure S3.** XPS spectra of MWCNTs/Co<sub>3</sub>O<sub>4</sub> (a) plum and (b) octahedron.

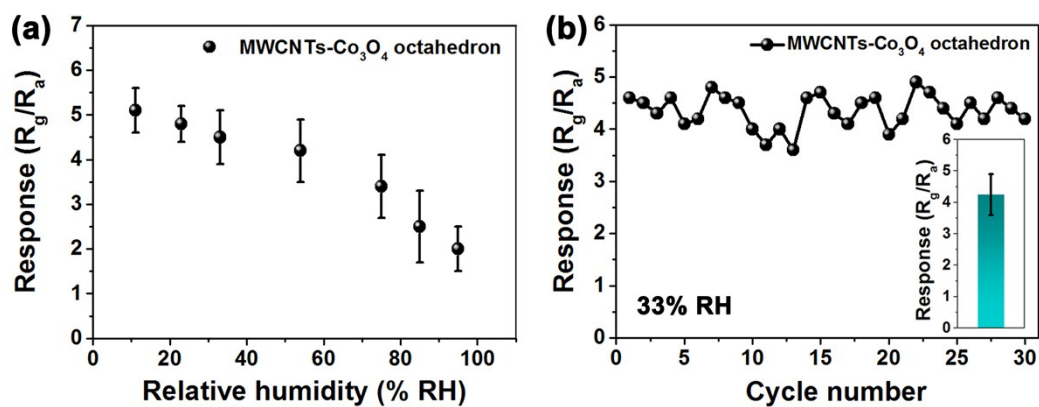

**Figure S4.** (a) Relationship between acetone sensing response and relative humidity; (b) cyclic testing at 33%RH of MWCNTs/Co<sub>3</sub>O<sub>4</sub> octahedron-based sensor. (measurement number=3)

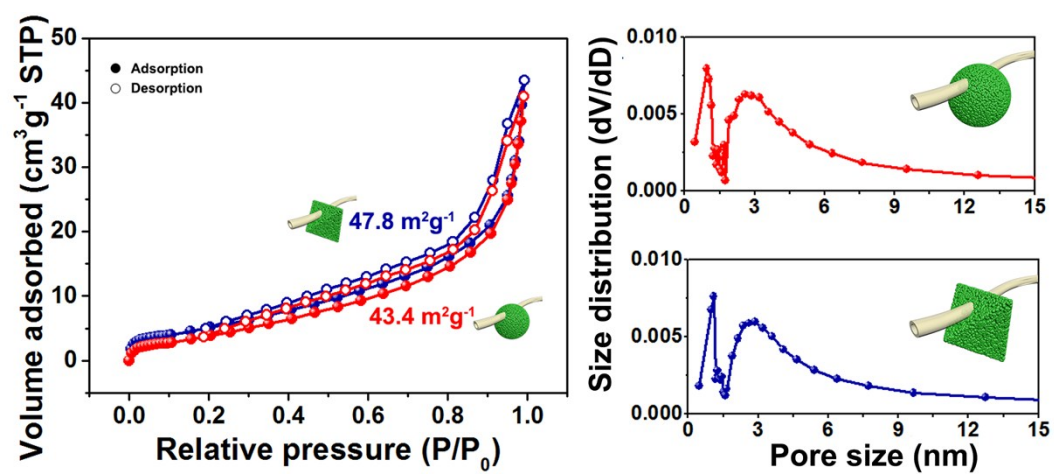

**Figure S5.**  $N_2$  adsorption-desorption isotherms and pore size distributing of of MWCNTs/ $Co_3O_4$  plum and octahedron.
